# Supplementary material for: The Impact of the Closure and Reopening of Golf Courses in the United Kingdom on Wellbeing During the COVID-19 Pandemic: A Multi-Study Approach
Source: PubMed Central journal article supplement (PMC7884885; doi:10.3389/fspor.2021.622171), 2021-02-02
Supplement: Table_2.pdf [file Table_2.pdf]

## SUPPLEMENTARY MATERIAL 2

Table A

Study 1 descriptive data using a 5-point Likert scale for key variables of interest.

| <b>Key Variables of Interest</b> | <b>Study 1</b> |
|----------------------------------|----------------|
| Personal competence (n= 297)     | 2.71 ± 0.84    |
| Sense of belonging (n= 291)      | 3.48 ± 1.05    |
| Enjoyment (n= 290)               | 4.48 ± 0.96    |
| Self-esteem (n= 294)             | 3.53 ± 1.09    |
| Self-Confidence (n= 294)         | 3.82 ± 1.00    |
| Resilience (n= 297)              | 3.41 ± 0.53    |
| Social connection (n= 296)       | 3.61 ± 0.90    |
| Wellbeing (n= 293)               | 3.67 ± 0.98    |
| Life Satisfaction (n= 290)       | 3.53 ± 1.05    |

Data are mean ± SD.

Table B

Study 1 descriptive data for physical activity levels.

| <b>Physical Activity</b>                                    | <b>Study 1</b>    |
|-------------------------------------------------------------|-------------------|
| Total MET.min <sup>-1</sup> .week <sup>-1</sup> (n= 291)    | 2710.71 ± 2194.71 |
| Light MET.min <sup>-1</sup> .week <sup>-1</sup> (n= 287)    | 680.82 ± 841.47   |
| Moderate MET.min <sup>-1</sup> .week <sup>-1</sup> (n= 289) | 1019.17 ± 972.72  |
| Vigorous MET.min <sup>-1</sup> .week <sup>-1</sup> (n= 281) | 1063.63 ± 1549.47 |

Data are mean ± SD. MET = metabolic equivalent.

Table C

Study 1 descriptive data for golf-related activities.

| <b>Golf-related Activity</b>                    | <b>Study 1</b> |
|-------------------------------------------------|----------------|
| Physical<br>(min.week <sup>-1</sup> ) (n= 283)  | 86 ± 165       |
| Sedentary<br>(min.week <sup>-1</sup> ) (n= 285) | 141 ± 229      |

Data are mean ± SD.

Table D

Physical activity between study 1 and study 2.

| <b>Physical Activity</b>                                          | <b>Study 1</b>    | <b>Study 2</b>    | <b>p-value</b>               | <b>Effect size<br/>(Cohen's d)</b> |
|-------------------------------------------------------------------|-------------------|-------------------|------------------------------|------------------------------------|
| Total MET.min <sup>-1</sup> .week <sup>-1</sup><br>(n= 123)       | 2785.98 ± 2327.94 | 2087.70 ± 1917.42 | <b>&lt;0.001<sup>a</sup></b> | <b>0.3</b>                         |
| Light MET.min <sup>-1</sup> .week <sup>-1</sup><br>(n= 123)       | 660.83 ± 869.37   | 614.66 ± 841.22   | 0.342 <sup>a</sup>           | 0.0                                |
| Moderate<br>MET.min <sup>-1</sup> .week <sup>-1</sup><br>(n= 123) | 1332.85 ± 3066.01 | 759.51 ± 864.81   | <b>&lt;0.001<sup>a</sup></b> | <b>0.2</b>                         |
| Vigorous<br>MET.min <sup>-1</sup> .week <sup>-1</sup><br>(n= 115) | 1111.65 ± 1796.41 | 758.26 ± 1265.14  | <b>0.024<sup>a</sup></b>     | <b>0.2</b>                         |

Data are mean ± SD. **Bold** values indicate statistical significance. <sup>a</sup> Non-normally distributed analysis. Significance granted at p<0.05.
